# Supplementary material for: Insights into the plasmonic “hot spots” and efficient hot electron injection induced by Ag nanoparticles in a covalent organic framework for photocatalytic H2 evolution
Source: Royal Society of Chemistry journal article supplement (doi:10.1039/d3ta06724f), 2024-01-01
Supplement: d3ta06724f1.pdf [file d3ta06724f1.pdf]

# Electronic Supplementary Information

## Insight into the plasmonic "hot spots" and efficient hot electron injection induced by Ag nanoparticles in a covalent organic framework for photocatalytic H<sub>2</sub> evolution

Lihua Zhang <sup>a,b</sup>, Xu Lu <sup>a</sup>, Jiaqi Sun <sup>a,b</sup>, Cunxia Wang <sup>a,b</sup>, Pengyu Dong <sup>a,\*</sup>

<sup>a</sup> Key Laboratory for Advanced Technology in Environmental Protection of Jiangsu Province, Yancheng Institute of Technology, Yancheng 224051, P. R. China.

<sup>b</sup> School of Mechanical Engineering, Yancheng Institute of Technology, Yancheng 224051, P. R. China

\* Corresponding authors.

*E-mail address:* dongpy11@gmail.com (P. Dong).

## 1. Supplementary Figures

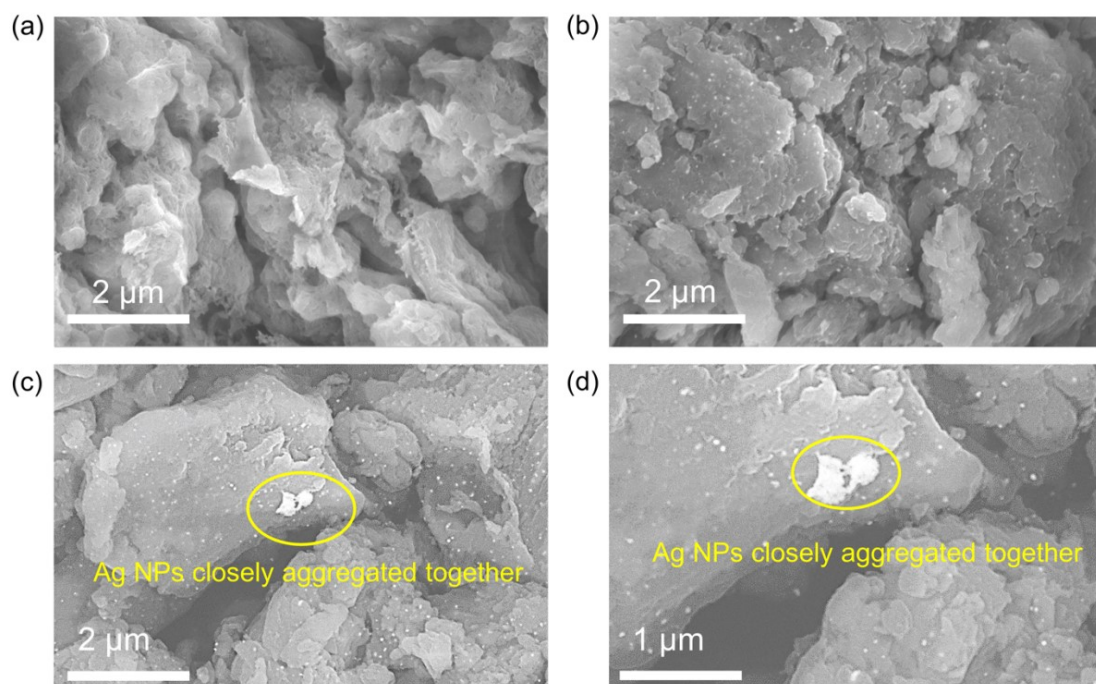

**Fig. S1.** SEM images of (a) TpPa-1-COF, (b) 3% Ag/TpPa-1, and (c, d) 5% Ag/TpPa-1.

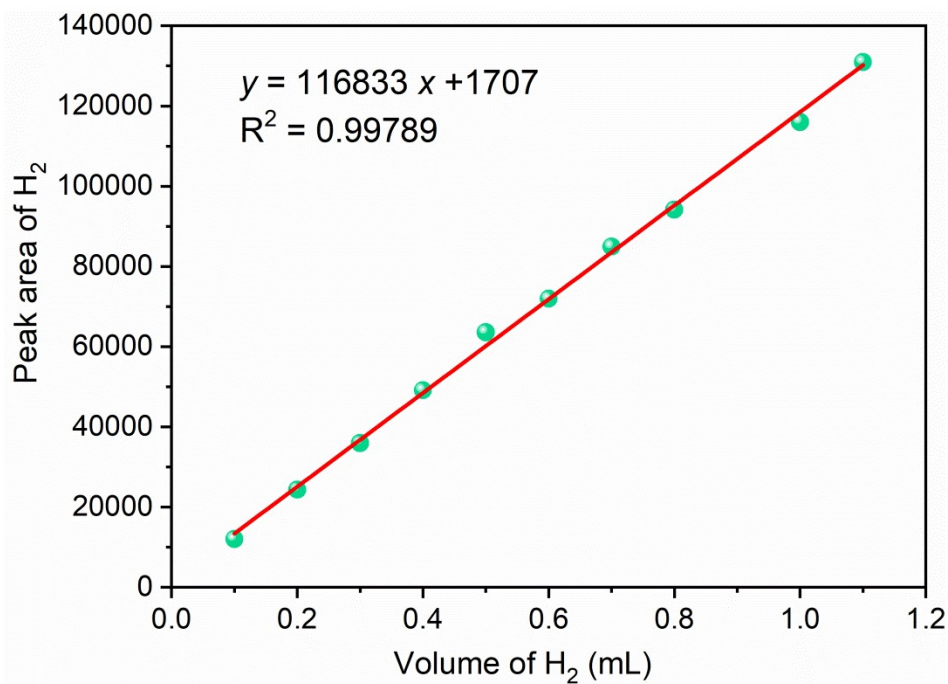

**Fig. S2.** The standard curve of H<sub>2</sub> production.

We quantify H<sub>2</sub> by the "external standard method" with the help of a standard curve. The standard curve is the trend line of the peak area with the volume/amount of the substance to be measured. After injecting 0.1 ml of high-purity H<sub>2</sub> into the photolytic water reaction system, the peak area S<sub>A1</sub> can be obtained on the gas chromatography, and then injecting a known volume of 0.1 mL of high-purity H<sub>2</sub> into the photolytic water reaction system (cumulative injection), the peak areas S<sub>A2</sub>, S<sub>A3</sub>, S<sub>A4</sub>, and S<sub>A5</sub> can be obtained respectively. After linear fitting, the standard curve can be obtained. The standard calibration curve of H<sub>2</sub> detection is shown in Fig. S3. According to the fitted standard curve, the relationship between the peak area and the volume of H<sub>2</sub> evolved can be expressed as Equation S1.

$$y = 116833x + 1707 \quad (\text{S1})$$

where  $y$  is the peak area corresponding to H<sub>2</sub> in the chromatography and  $x$  is the volume of H<sub>2</sub> (mL).

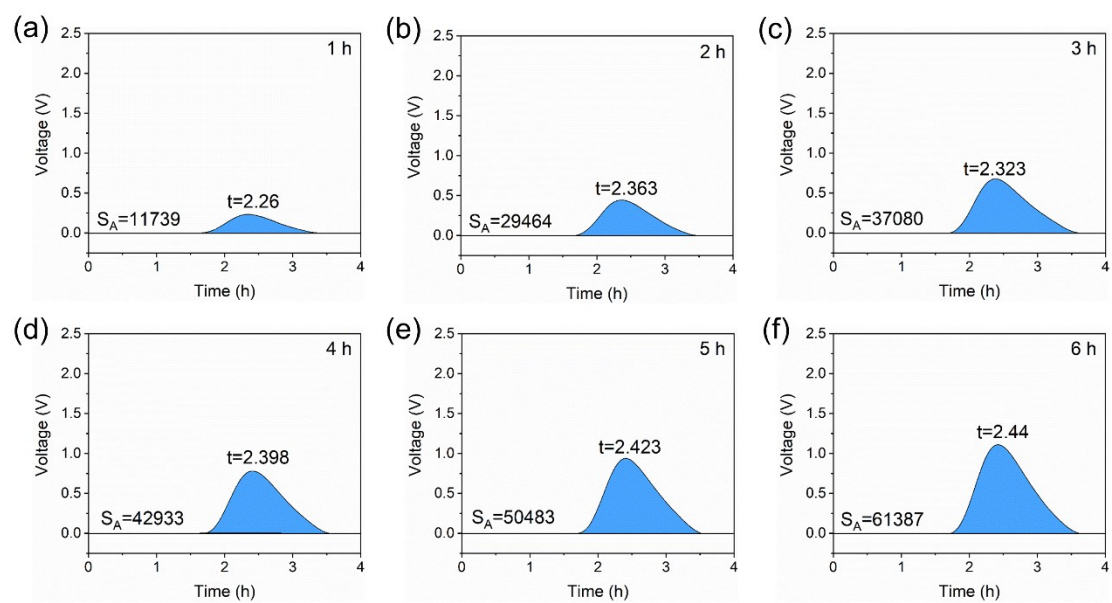

**Fig. S3.** The chromatogram of H<sub>2</sub> evolved over TpPa-1-COF.

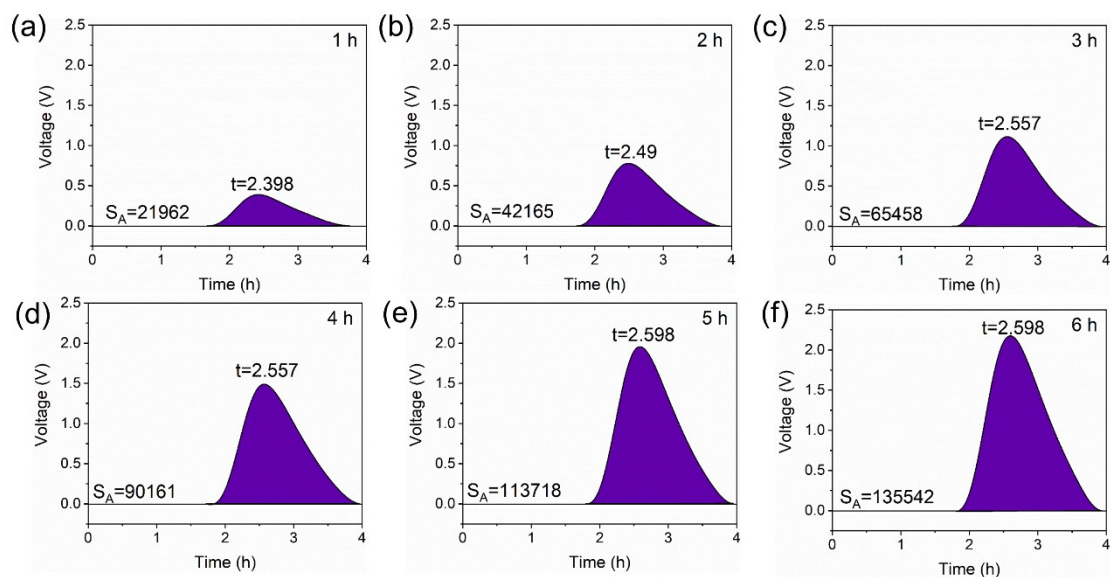

**Fig. S4.** The chromatogram of H<sub>2</sub> evolved over 3% Ag/TpPa-1.

The volume of H<sub>2</sub> produced by the photolytic water reaction can be calculated by substituting the peak area measured by the photolytic water experiment according to the standard curve. An example of the H<sub>2</sub> evolved chromatogram is given in Fig. S5, which illustrates the process of the peak area over 3% Ag/TpPa-1 photocatalyst under visible light irradiation. The amount of H<sub>2</sub> evolved was determined at an interval of 1 h using an online gas chromatograph instrument with a thermal conductivity detector. The measured peak area was converted into the H<sub>2</sub> evolution rate according to the standard curve (Equation S1).

The number of generated moles ( $\mu\text{mol}$ ) of H<sub>2</sub> generated can be expressed as Equation S2.

$$n = \frac{V}{22.4} \quad (\text{S2})$$

where  $n$  is the number of moles ( $\mu\text{mol}$ ) of H<sub>2</sub> produced,  $V$  is the hydrogen volume evolved (mL), and 22.4 is the molar volume of the gas (mL  $\mu\text{mol}^{-1}$ ).

Moreover, the number of moles of hydrogen produced per mass of photocatalyst

( $\mu\text{mol g}^{-1}$ ) can be expressed as Equation S3:

$$C(\text{H}_2) = \frac{n}{m} \quad (\text{S3})$$

where  $C(\text{H}_2)$  is the number of moles of hydrogen produced per mass of photocatalyst ( $\mu\text{mol g}^{-1}$ ) and  $m$  is the amount of photocatalyst (g) added in the photocatalytic reactor.

Furthermore, the mean value of the amount of  $\text{H}_2$  produced per unit mass of photocatalyst and per unit time ( $\mu\text{mol g}^{-1} \text{h}^{-1}$ ) can be evaluated according to Equation S4–S5.

$$P(\text{H}_2) = \frac{C(\text{H}_2)}{t} \quad (\text{S4})$$

$$\bar{P}(\text{H}_2) = \frac{\sum_{i=1}^{n=6} P_i(\text{H}_2)}{n} \quad (\text{S5})$$

where  $P$  is the amount of  $\text{H}_2$  produced per gram of photocatalyst per hour ( $\mu\text{mol g}^{-1} \text{h}^{-1}$ ) and  $\bar{P}$  is the mean value of  $P$  ( $\mu\text{mol g}^{-1} \text{h}^{-1}$ ).

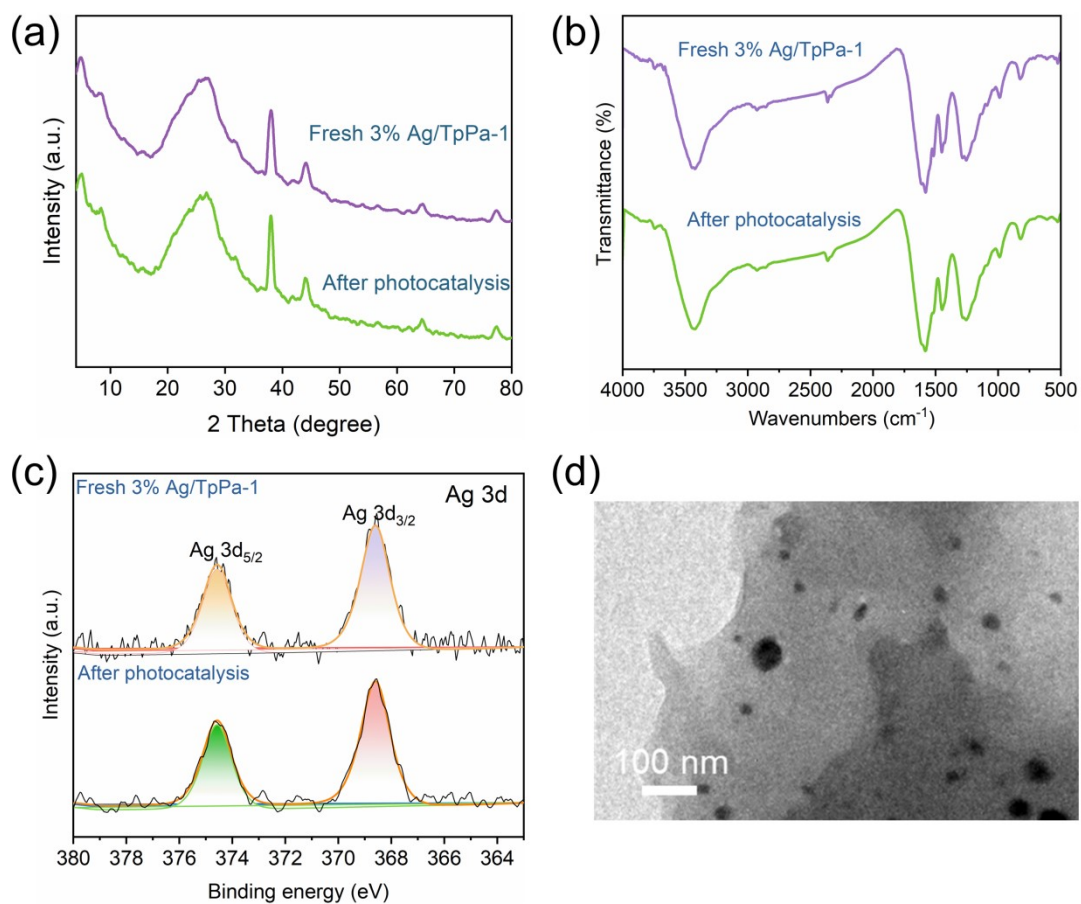

**Fig. S5.** A comparison of (a) XRD pattern, (b) FTIR spectrum, (c) XPS spectrum, and (d) TEM image of 3% Ag/TpPa-1 before and after photocatalysis.

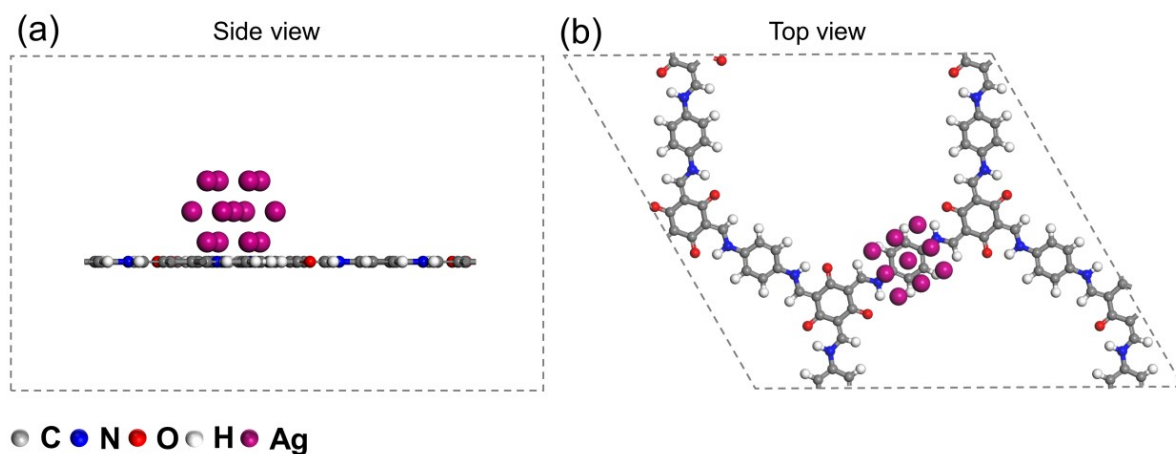

**Fig. S6.** The constructed geometry model consisted of one unit cell of the TpPa-1-COF (001) plane and an Ag<sub>13</sub> cluster from (a) side view and (b) top view.

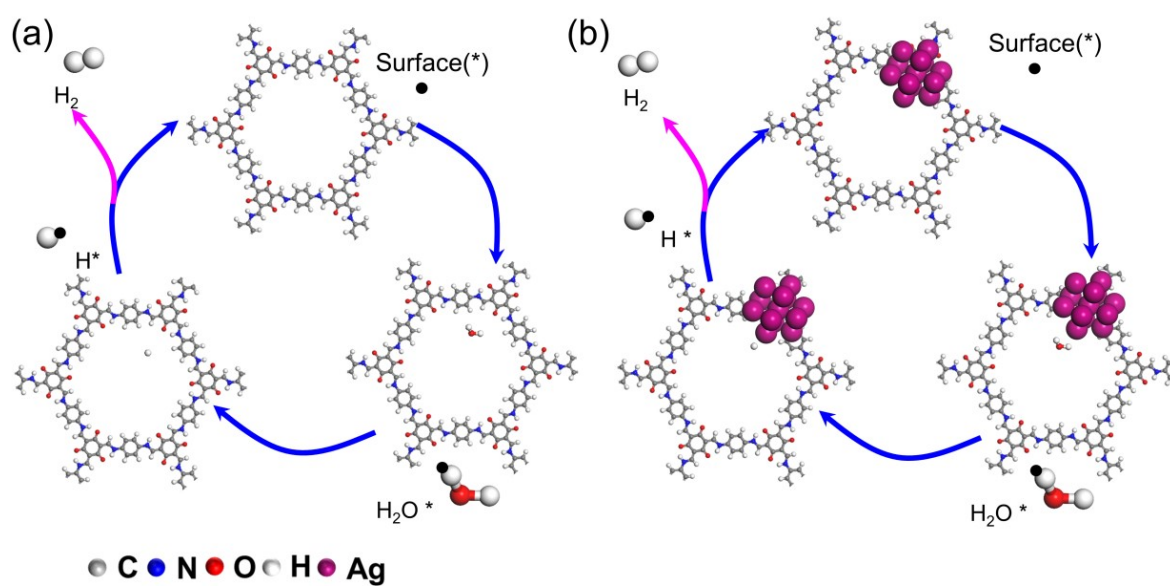

**Fig. S7.** H<sub>2</sub> evolution process over (a) TpPa-1-COF and (b) Ag/TpPa-1.



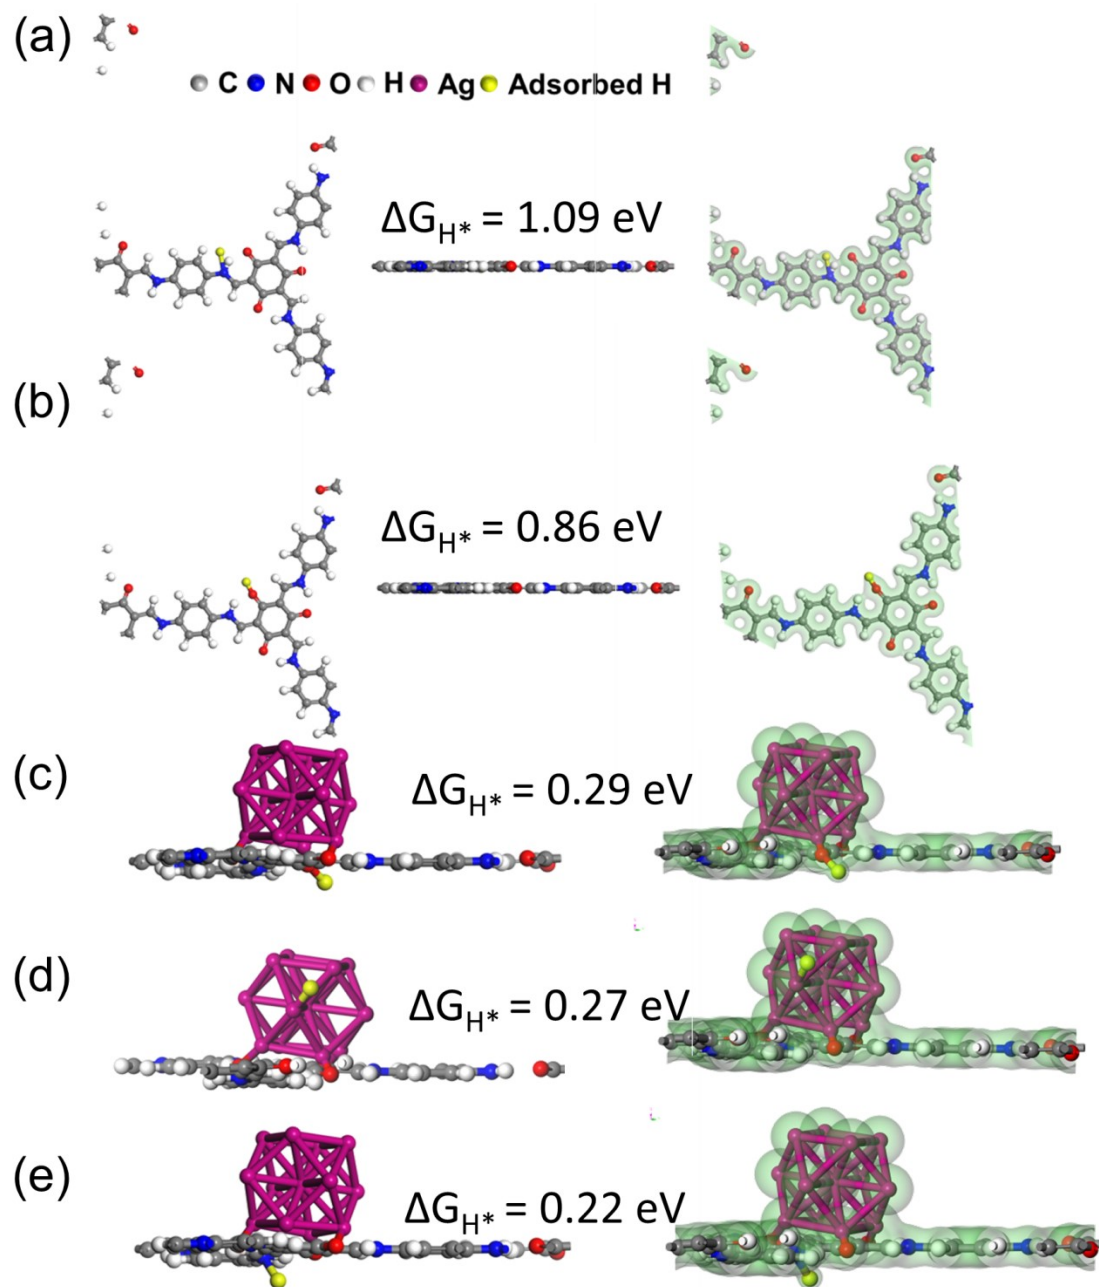

**Fig. S8** Atomic structures and the corresponding charge densities of these structures with one H atom adsorbed on (a) N site in TpPa-1, (b) O site in TpPa-1, (c) O site in Ag/TpPa-1, (d) Ag site in Ag/TpPa-1, and (e) N site in Ag/TpPa-1.

## 2. Supplementary Tables

**Table S1.** Structural parameters obtained from the Ag L<sub>3</sub>-edge EXAFS fitting.

| Sample    | Shell | <sup>a</sup> <i>N</i> | <sup>b</sup> <i>R</i> (Å) | <sup>c</sup> $\sigma^2$ (Å <sup>2</sup> ) | <sup>d</sup> $\Delta E_0$ (eV) | <i>R</i> , % |
|-----------|-------|-----------------------|---------------------------|-------------------------------------------|--------------------------------|--------------|
| Ag foil   | Ag–Ag | 12                    | 2.88±0.01                 | 0.0100                                    | 1.97±0.37                      | 0.0074       |
|           | Ag–O  | 2                     | 2.36±0.01                 | 0.0020                                    |                                |              |
| Ag/TpPa-1 | Ag–O  | 2                     | 2.86±0.01                 | 0.0017                                    | –8.06±1.52                     | 0.0120       |
|           | Ag–Ag | 4                     | 3.25±0.01                 | 0.0088                                    |                                |              |

<sup>a</sup>*N*: numbers for coordination, <sup>b</sup>*R*: bond distance, <sup>c</sup> $\sigma^2$ : Debye–Waller factors, <sup>d</sup> $\Delta E_0$ : the inner potential correction, *R* factor (%): degree of the fitting. Based on the experimental EXAFS fitting of the reference Ag foil,  $S_0^2$  was determined to be 1.0 by fixing *N* as the known crystallographic value. The estimated error boundaries, or accuracy, were *N*, ±5%, and *R*, ±1%.

Athena (version 0.9.26) software was used to perform background, pre-edge line, and post-edge line calibrations on the collected XAFS data. After that, a Fourier-transformed fitting was done. For each fitting, the *k* range of 3–12 Å<sup>−1</sup> and the *R* range of 1.4–3.0 Å were used, along with the  $k^3$  weighting. Without any fixed, limited, or correlated variables, the four parameters (*N*, *R*,  $\sigma^2$ , and  $\Delta E_0$ ) – coordination number, bond length, Debye–Waller factor, and  $E_0$  shift were fitted.

The  $\chi(k)$  obtained by Athena was loaded into the Hama Fortran code for Wavelet Transform analysis. The following parameters were specified: *k* range = 0–12 Å<sup>−1</sup>, *k* weight = 3, *R* range = 1–4 Å, and a mother Morlet function with  $\kappa = 10$  and  $\sigma = 1$ .

**Table S2.** An overview of the H<sub>2</sub> evolution activity in some COFs-based and Ag-related photocatalytic systems.

| Photocatalyst                                      | Co-catalyst       | Sacrificial agent | Solvent              | Illumination    | Activity (μmol g <sup>-1</sup> h <sup>-1</sup> ) | AQE (%)        | Ref.          |
|----------------------------------------------------|-------------------|-------------------|----------------------|-----------------|--------------------------------------------------|----------------|---------------|
| 3% Ag/TpPa-1                                       | –                 | Ascorbic acid     | H <sub>2</sub> O     | ≥ 420 nm        | 801                                              | 1.2 (450nm)    | This work     |
| 3% Pt <sub>1</sub> @TpPa-1-COF                     | –                 | Sodium ascorbate  | PBS                  | ≥ 420 nm        | 719                                              | 0.38 (420 nm)  | <sup>1</sup>  |
| MS-c@TpPa-1 (0.3:1)                                | –                 | Sodium ascorbate  | PBS                  | ≥420 nm         | 528                                              | 0.54 (420 nm)  | <sup>2</sup>  |
| α-Fe <sub>2</sub> O <sub>3</sub> /TpPa-2-COF (3:7) | –                 | Sodium ascorbate  | PBS                  | ≥ 420 nm        | 3770                                             | 0.137 (450 nm) | <sup>3</sup>  |
| CTF-HUST-2                                         | 3 wt% Pt          | TEOA              | H <sub>2</sub> O     | ≥ 420 nm        | 2647                                             | –              | <sup>4</sup>  |
| N <sub>0</sub> -COF                                | Pt                | TEOA              | PBS                  | ≥ 420 nm        | 23                                               | –              | <sup>5</sup>  |
| N <sub>1</sub> -COF                                | Pt                | TEOA              | PBS                  | ≥ 420 nm        | 90                                               | 0.075 (450 nm) | <sup>5</sup>  |
| N <sub>2</sub> -COF                                | Pt                | TEOA              | PBS                  | ≥ 420 nm        | 438                                              | 0.18 (450 nm)  | <sup>5</sup>  |
| N <sub>3</sub> -COF                                | Pt                | TEOA              | PBS                  | ≥ 420 nm        | 1703                                             | 0.44 (450 nm)  | <sup>5</sup>  |
| TP-BDDA                                            | Pt                | TEOA              | H <sub>2</sub> O     | ≥ 395 nm        | 324                                              | 1.3 (420 nm)   | <sup>6</sup>  |
| TP-EDDA                                            | Pt                | TEOA              | H <sub>2</sub> O     | ≥ 395 nm        | 30                                               | –              | <sup>6</sup>  |
| COF-42                                             | Co-1 <sup>a</sup> | TEOA              | ACN/H <sub>2</sub> O | AM 1.5          | 233                                              | –              | <sup>7</sup>  |
| Co <sub>1</sub> -phosphide/PCN                     |                   | None              | H <sub>2</sub> O     | ≥ 300 nm        | 410                                              | 3.6 (420 nm)   | <sup>8</sup>  |
| ZnPor-DETH-COF                                     | 8 wt% Pt          | TEOA              | PBS                  | ≥ 400 nm        | 413                                              | 0.063 (450 nm) | <sup>9</sup>  |
| g-C <sub>18</sub> N <sub>3</sub> -COF              | 3 wt% Pt          | AA                | H <sub>2</sub> O     | ≥ 420 nm        | 292                                              | 1.06 (420 nm)  | <sup>10</sup> |
| TpDTz                                              | NiME cluster      | TEOA              | H <sub>2</sub> O     | AM 1.5          | 941                                              | 0.2 (400 nm)   | <sup>11</sup> |
| TFA-COF                                            | Pt                | TEOA              | H <sub>2</sub> O     | Full wavelength | 80                                               | –              | <sup>12</sup> |
| COF-alkene                                         | 3 wt% Pt          | TEOA              | H <sub>2</sub> O     | ≥ 420 nm        | 2330                                             | 6.7 (420 nm)   | <sup>13</sup> |
| COF-imide                                          | 3 wt%             | TEOA              | H <sub>2</sub> O     | ≥ 420 nm        | 34                                               | –              | <sup>13</sup> |

| Photocatalyst                                                                       | Co-catalyst    | Sacrificial agent               | Solvent          | Illumination          | Activity ( $\mu\text{mol g}^{-1} \text{h}^{-1}$ ) | AQE (%)      | Ref. |
|-------------------------------------------------------------------------------------|----------------|---------------------------------|------------------|-----------------------|---------------------------------------------------|--------------|------|
| COF-imine                                                                           | Pt<br>3 wt%    | TEOA                            | H <sub>2</sub> O | $\geq 420 \text{ nm}$ | 12                                                | –            | 13   |
| 5% Ag-g-C <sub>3</sub> N <sub>4</sub>                                               | –              | TEOA                            | H <sub>2</sub> O | $\geq 420 \text{ nm}$ | 586.9                                             | –            | 14   |
| Ag/SnO <sub>2</sub>                                                                 | –              | TEOA                            | H <sub>2</sub> O | $\geq 420 \text{ nm}$ | 700                                               | 7.8 (420 nm) | 15   |
| Ag/TNF 1%                                                                           | –              |                                 | H <sub>2</sub> O | $\geq 420 \text{ nm}$ | 146.7                                             | 1.3 (420 nm) | 16   |
| PI/Ag-1                                                                             | –              | Methanol                        | H <sub>2</sub> O | $\geq 420 \text{ nm}$ | 166                                               | –            | 17   |
| Ag@N/O-C                                                                            | –              | TEOA                            | H <sub>2</sub> O | AM 1.5                | 44.9                                              | –            | 18   |
| AgNS-CdS                                                                            | –              | Na <sub>2</sub> SO <sub>3</sub> | H <sub>2</sub> O | $> 400 \text{ nm}$    | 341                                               | –            | 19   |
| rGO-AgBr/Ag                                                                         | –              | TEOA                            | H <sub>2</sub> O | AM 1.5                | 72.71                                             | 2.38%        | 20   |
| Ag/SnO <sub>2</sub> /C <sub>3</sub> N <sub>4</sub>                                  | –              | Methanol                        | H <sub>2</sub> O | $\geq 420 \text{ nm}$ | 270                                               | –            | 21   |
| Ag/CQDs/g-C <sub>3</sub> N <sub>4</sub>                                             | –              | TEOA                            | H <sub>2</sub> O | $\geq 400 \text{ nm}$ | 626.93                                            | –            | 22   |
| Ag/PANI/3DOMM-TiO <sub>2-x</sub>                                                    | –              | Methanol                        | H <sub>2</sub> O | AM 1.5                | 420.90                                            | –            | 23   |
| Ag/N-TiO <sub>2-x</sub>                                                             | –              | Methanol                        | H <sub>2</sub> O | AM1.5                 | 186.2                                             | –            | 24   |
| Ag/S-TiO <sub>2-x</sub>                                                             | –              | -                               | H <sub>2</sub> O | AM1.5                 | 209.2                                             | –            | 25   |
| Ag/g-C <sub>3</sub> N <sub>4</sub>                                                  | 1.0<br>wt% Pt  | TEOA                            | H <sub>2</sub> O | $\geq 420 \text{ nm}$ | 625                                               | –            | 26   |
| Ag/ND/g-C <sub>3</sub> N <sub>4</sub>                                               | –              | TEOA                            | H <sub>2</sub> O | $\geq 420 \text{ nm}$ | 158                                               | –            | 27   |
| Ag <sub>2</sub> S/KCN-5                                                             | 0.37<br>wt% Pt | CH <sub>3</sub> OH              | H <sub>2</sub> O | $\geq 420 \text{ nm}$ | 96                                                | –            | 28   |
| Ag/Ag <sub>2</sub> Ta <sub>4</sub> O <sub>11</sub> /g-C <sub>3</sub> N <sub>4</sub> | –              | TEOA                            | H <sub>2</sub> O | $\geq 420 \text{ nm}$ | 100.44                                            | –            | 29   |

## References

1. P. Dong, Y. Wang, A. Zhang, T. Cheng, X. Xi and J. Zhang, *ACS Catal.*, 2021, **11**, 13266-13279.
2. Y. Wang, P. Dong, K. Zhu, A. Zhang, J. Pan, Z. Chen, Z. Li, R. Guan, X. Xi and J. Zhang, *Chem. Eng. J.*, 2022, **446**, 136883.
3. Y.-P. Zhang, H.-L. Tang, H. Dong, M.-Y. Gao, C.-C. Li, X.-J. Sun, J.-Z. Wei, Y. Qu, Z.-J. Li and F.-M. Zhang, *J. Mater. Chem. A*, 2020, **8**, 4334-4340.
4. K. Wang, L.-M. Yang, X. Wang, L. Guo, G. Cheng, C. Zhang, S. Jin, B. Tan and A. Cooper, *Angew. Chem. Int. Ed.*, 2017, **56**, 14149-14153.
5. V. S. Vyas, F. Haase, L. Stegbauer, G. Savasci, F. Podjaski, C. Ochsenfeld and B. V. Lotsch, *Nat. Commun.*, 2015, **6**, 8508.
6. P. Pachfule, A. Acharjya, J. Roeser, T. Langenhahn, M. Schwarze, R. Schomacker, A. Thomas and J. Schmidt, *J. Am. Chem. Soc.*, 2018, **140**, 1423-1427.
7. T. Banerjee, F. Haase, G. Savasci, K. Gottschling, C. Ochsenfeld and B. V. Lotsch, *J. Am. Chem. Soc.*, 2017, **139**, 16228-16234.
8. W. Liu, L. Cao, W. Cheng, Y. Cao, X. Liu, W. Zhang, X. Mou, L. Jin, X. Zheng, W. Che, Q. Liu, T. Yao and S. Wei, *Angew. Chem. Int. Ed.*, 2017, **56**, 9312-9317.
9. R. Chen, Y. Wang, Y. Ma, A. Mal, X. Y. Gao, L. Gao, L. Qiao, X. B. Li, L. Z. Wu and C. Wang, *Nat. Commun.*, 2021, **12**, 1354-1363.
10. S. Wei, F. Zhang, W. Zhang, P. Qiang, K. Yu, X. Fu, D. Wu, S. Bi and F. Zhang, *J. Am. Chem. Soc.*, 2019, **141**, 14272-14279.
11. B. P. Biswal, H. A. Vignolo-Gonzalez, T. Banerjee, L. Grunenberg, G. Savasci, K. Gottschling, J. Nuss, C. Ochsenfeld and B. V. Lotsch, *J. Am. Chem. Soc.*, 2019, **141**, 11082-11092.
12. C. Liu, Y. Xiao, Q. Yang, Y. Wang, R. Lu, Y. Chen, C. Wang and H. Yan, *Appl. Surf. Sci.*, 2021, **537**, 148082.
13. C. Mo, M. Yang, F. Sun, J. Jian, L. Zhong, Z. Fang, J. Feng and D. Yu, *Adv. Sci.*, 2020, **7**, 1902988.

14. T. Ren, Y. Dang, Y. Xiao, Q. Hu, D. Deng, J. Chen and P. He, *Inorg. Chem. Commun.*, 2021, **123**, 108367.
15. M. Q. Wang, Y. Liu, M. Zheng and X. Zhou, *Colloids Surf. A Physicochem. Eng. Asp.*, 2022, **650**, 129577.
16. W. L. Zhong, C. Wang, S. L. Peng, R. Y. Shu, Z. P. Tian, Y. P. Du and Y. Chen, *Int. J. Hydrog. Energy*, 2022, **47**, 16507-16517.
17. X. F. Zhao, X. B. Yi, X. Q. Wang, W. Chu, S. P. Guo, J. Zhang, B. X. Liu and X. C. Liu, *Appl. Surf. Sci.*, 2020, **502**, 144187.
18. Y. Yang, G. L. Zhuang, L. M. Sun, X. B. Zhang, X. Q. Yan, W. W. Zhan, X. J. Wang and X. G. Han, *J. Mater. Chem. A*, 2020, **8**, 17449-17453.
19. H. Jung, Y. Whang and S. W. Han, *B. Korean Chem. Soc.*, 2021, **42**, 806-809.
20. X. Wang, W. Li, S. A. He, Q. Ma, B. C. Yan, N. Meng and L. F. Hao, *Int. J. Energy Res.*, 2020, **44**, 833-844.
21. J. F. Wang, P. Fazil, M. I. A. Shah, A. Zada, N. Anwar, G. G. Zain, W. Khan, F. Jan, T. F. Lei and M. Ateeq, *Int. J. Hydrog. Energy*, 2023, **48**, 21674-21685.
22. J. Qin and H. Zeng, *Appl. Catal. B*, 2017, **209**, 161-173.
23. Z. Xu, C. Guo, X. Liu, L. Li, L. Wang, H. Xu, D. Zhang, C. Li, Q. Li and W. Wang, *Chin. J. Catal.*, 2022, **43**, 1360-1370.
24. J. Jiang, Z. Xing, M. Li, Z. Li, J. Yin, J. Kuang, J. Zou, Q. Zhu and W. Zhou, *J. Colloid Interface Sci.*, 2018, **521**, 102-110.
25. M. Li, Z. Xing, J. Jiang, Z. Li, J. Yin, J. Kuang, S. Tan, Q. Zhu and W. Zhou, *J. Taiwan Inst Chem Eng.*, 2018, **82**, 198-204.
26. J. Wang, J. Cong, H. Xu, J. Wang, H. Liu, M. Liang, J. Gao, Q. Ni and J. Yao, *ACS Sustain.*, 2017, **5**, 10633-10639.
27. L.-X. Su, Q. Lou, C.-X. Shan, D.-L. Chen, J.-H. Zang and L.-J. Liu, *Appl. Surf. Sci.*, 2020, **525**, 146576.
28. Q. Zhang, P. Chen, L. Chen, M. Wu, X. Dai, P. Xing, H. Lin, L. Zhao and Y. He, *J. Colloid Interface Sci.*, 2020, **568**, 117-129.
29. Y. Wu, M. Song, Z. Chai and X. Wang, *J. Colloid Interface Sci.*, 2019, **550**, 64-

72.
